# Supplementary material for: Surface Area of Early Visual Cortex Predicts Individual Speed of Traveling Waves During Binocular Rivalry
Source: Oxford University Press journal article supplement (doi:10.1093/cercor/bht342), 2013-12-10
Supplement: bht342_Supplementary_Data.zip [file bht342_Supplementary_Data.zip]

Archive with 1 entries (1 files):
- bht342supp.pdf
