# Supplementary material for: Surface Area of Early Visual Cortex Predicts Individual Speed of Traveling Waves During Binocular Rivalry
Source: Oxford University Press journal article supplement (doi:10.1093/cercor/bht342), 2013-12-10
Supplement: bht342_Supplementary_Data.zip [file bht342_Supplementary_Data.zip › bht342supp.pdf]

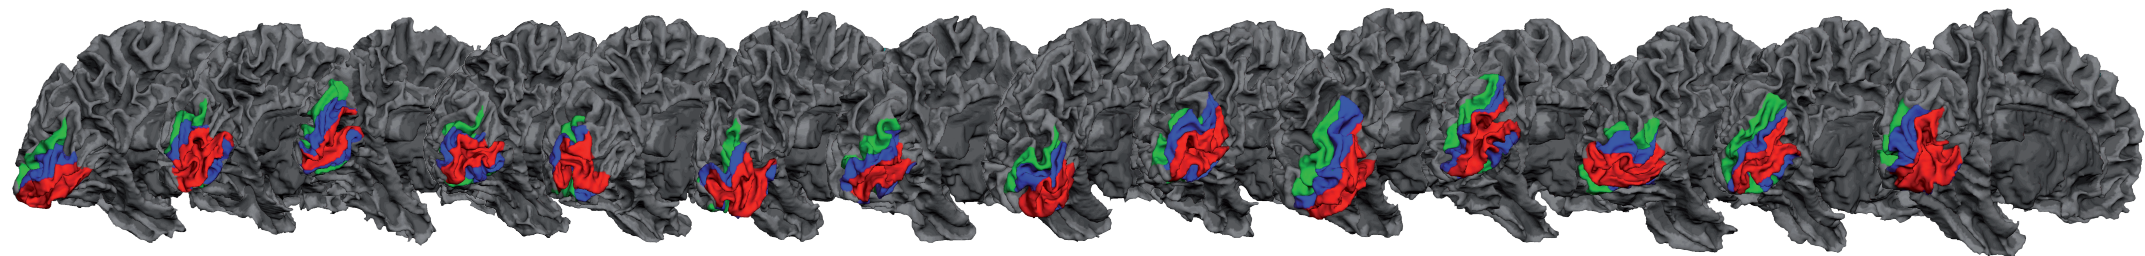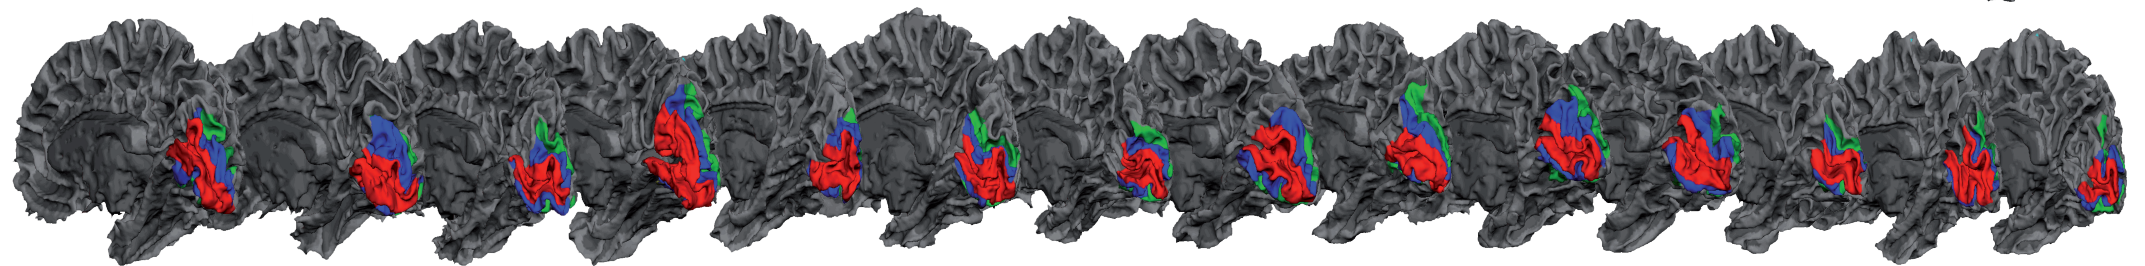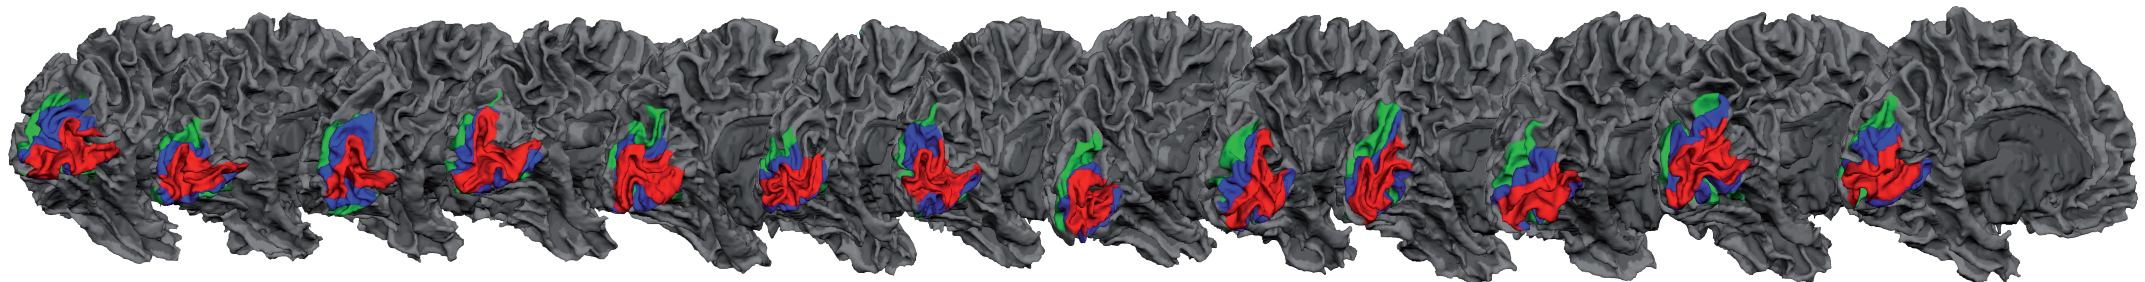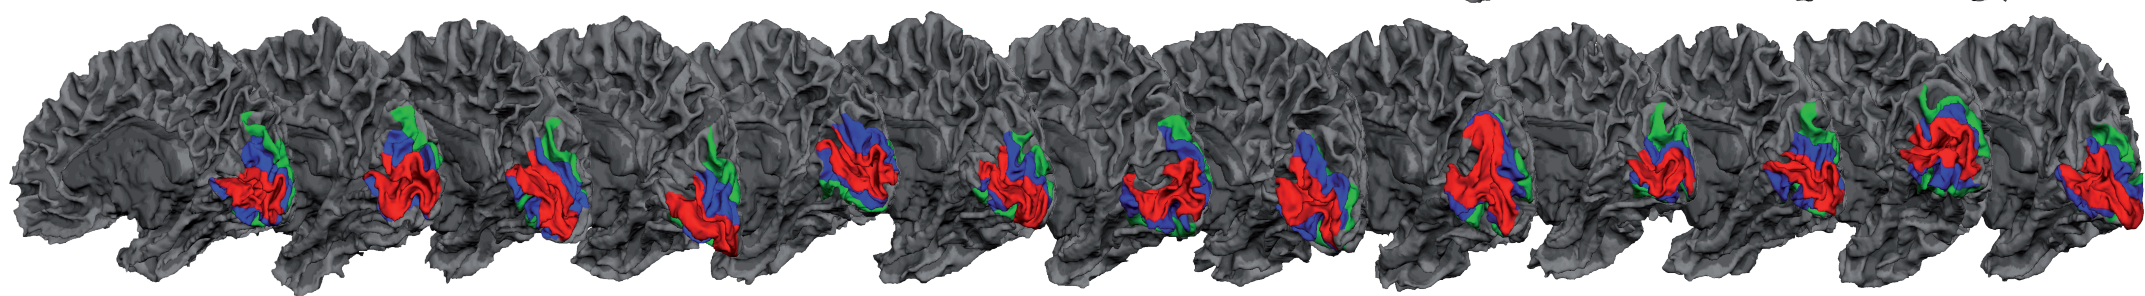

**Figure S1.** Variability in cortical surface size of early visual areas. Representative maps showing cortical regions V1-V3 on a reconstructed three-dimensional mesh of the left (top) and right (bottom) hemisphere of all participants. Red indicates V1, blue indicates V2 and green indicates V3.
